# Supplementary material
Source: publisher figshare collection journal article supplement (https://acs.figshare.com/ndownloader/files/4528816)
Supplement: Supplementary file 1 [file 4528816]

  
data_060723b 
  
_audit_creation_method            SHELXL-97 
_chemical_name_systematic 
; 
 ? 
; 
_chemical_name_common             ? 
_chemical_melting_point           ? 
_chemical_formula_moiety          ? 
_chemical_formula_sum 
 'C8 H7 O10 Pr' 
_chemical_formula_weight          404.05 
  
loop_ 
 _atom_type_symbol 
 _atom_type_description 
 _atom_type_scat_dispersion_real 
 _atom_type_scat_dispersion_imag 
 _atom_type_scat_source 
 'C'  'C'   0.0033   0.0016 
 'International Tables Vol C Tables 4.2.6.8 and 6.1.1.4' 
 'H'  'H'   0.0000   0.0000 
 'International Tables Vol C Tables 4.2.6.8 and 6.1.1.4' 
 'O'  'O'   0.0106   0.0060 
 'International Tables Vol C Tables 4.2.6.8 and 6.1.1.4' 
 'Pr'  'Pr'  -0.2180   2.8214 
 'International Tables Vol C Tables 4.2.6.8 and 6.1.1.4' 
  
_symmetry_cell_setting            Monoclinic 
_symmetry_space_group_name_H-M    C2/c 
  
loop_ 
 _symmetry_equiv_pos_as_xyz 
 'x, y, z' 
 '-x, y, -z+1/2' 
 'x+1/2, y+1/2, z' 
 '-x+1/2, y+1/2, -z+1/2' 
 '-x, -y, -z' 
 'x, -y, z-1/2' 
 '-x+1/2, -y+1/2, -z' 
 'x+1/2, -y+1/2, z-1/2' 
  
_cell_length_a                    21.507(2) 
_cell_length_b                    6.8401(8) 
_cell_length_c                    16.2843(19) 
_cell_angle_alpha                 90.00 
_cell_angle_beta                  120.453(2) 
_cell_angle_gamma                 90.00 
_cell_volume                      2065.1(4) 
_cell_formula_units_Z             8 
_cell_measurement_temperature     294(2) 
_cell_measurement_reflns_used     4041 
_cell_measurement_theta_min       2.90 
_cell_measurement_theta_max       26.37 
  
_exptl_crystal_description        ? 
_exptl_crystal_colour             ? 
_exptl_crystal_size_max           0.18 
_exptl_crystal_size_mid           0.12 
_exptl_crystal_size_min           0.10 
_exptl_crystal_density_meas       NONE 
_exptl_crystal_density_diffrn     2.599 
_exptl_crystal_density_method     'not measured' 
_exptl_crystal_F_000              1552 
_exptl_absorpt_coefficient_mu     4.773 
_exptl_absorpt_correction_type    MULTI-SCAN 
_exptl_absorpt_correction_T_min   0.706349 
_exptl_absorpt_correction_T_max   1.000000 
_exptl_absorpt_process_details    SADABS 
  
_exptl_special_details 
; 
 ? 
; 
  
_diffrn_ambient_temperature       294(2) 
_diffrn_radiation_wavelength      0.71073 
_diffrn_radiation_type            MoK\a 
_diffrn_radiation_source          'fine-focus sealed tube' 
_diffrn_radiation_monochromator   graphite 
_diffrn_measurement_device_type   'CCD area detector' 
_diffrn_measurement_method        'phi and omega scans' 
_diffrn_detector_area_resol_mean  ? 
_diffrn_standards_number          . 
_diffrn_standards_interval_count  . 
_diffrn_standards_interval_time   . 
_diffrn_standards_decay_%         . 
_diffrn_reflns_number             5603 
_diffrn_reflns_av_R_equivalents   0.0305 
_diffrn_reflns_av_sigmaI/netI     0.0288 
_diffrn_reflns_limit_h_min        -22 
_diffrn_reflns_limit_h_max        26 
_diffrn_reflns_limit_k_min        -8 
_diffrn_reflns_limit_k_max        7 
_diffrn_reflns_limit_l_min        -20 
_diffrn_reflns_limit_l_max        20 
_diffrn_reflns_theta_min          2.20 
_diffrn_reflns_theta_max          26.37 
_reflns_number_total              2109 
_reflns_number_gt                 1977 
_reflns_threshold_expression      >2sigma(I) 
  
_computing_data_collection        'Bruker SMART' 
_computing_cell_refinement        'Bruker SMART' 
_computing_data_reduction         'Bruker SAINT' 
_computing_structure_solution     'SHELXS-97 (Sheldrick, 1990)' 
_computing_structure_refinement   'SHELXL-97 (Sheldrick, 1997)' 
_computing_molecular_graphics     'Bruker SHELXTL' 
_computing_publication_material   'Bruker SHELXTL' 
  
_refine_special_details 
; 
 Refinement of F^2^ against ALL reflections.  The weighted R-factor wR and 
 goodness of fit S are based on F^2^, conventional R-factors R are based 
 on F, with F set to zero for negative F^2^. The threshold expression of 
 F^2^ > 2sigma(F^2^) is used only for calculating R-factors(gt) etc. and is 
 not relevant to the choice of reflections for refinement.  R-factors based 
 on F^2^ are statistically about twice as large as those based on F, and R- 
 factors based on ALL data will be even larger. 
; 
  
_refine_ls_structure_factor_coef  Fsqd 
_refine_ls_matrix_type            full 
_refine_ls_weighting_scheme       calc 
_refine_ls_weighting_details 
 'calc w=1/[\s^2^(Fo^2^)+(0.0087P)^2^+20.7609P] where P=(Fo^2^+2Fc^2^)/3' 
_atom_sites_solution_primary      direct 
_atom_sites_solution_secondary    difmap 
_atom_sites_solution_hydrogens    geom 
_refine_ls_hydrogen_treatment     Mixed 
_refine_ls_extinction_method      none 
_refine_ls_extinction_coef        ? 
_refine_ls_number_reflns          2109 
_refine_ls_number_parameters      189 
_refine_ls_number_restraints      13 
_refine_ls_R_factor_all           0.0307 
_refine_ls_R_factor_gt            0.0278 
_refine_ls_wR_factor_ref          0.0649 
_refine_ls_wR_factor_gt           0.0635 
_refine_ls_goodness_of_fit_ref    1.295 
_refine_ls_restrained_S_all       1.346 
_refine_ls_shift/su_max           0.002 
_refine_ls_shift/su_mean          0.000 
  
loop_ 
 _atom_site_label 
 _atom_site_type_symbol 
 _atom_site_fract_x 
 _atom_site_fract_y 
 _atom_site_fract_z 
 _atom_site_U_iso_or_equiv 
 _atom_site_adp_type 
 _atom_site_occupancy 
 _atom_site_symmetry_multiplicity 
 _atom_site_calc_flag 
 _atom_site_refinement_flags 
 _atom_site_disorder_assembly 
 _atom_site_disorder_group 
Pr1 Pr 0.096221(14) 0.46810(4) 0.151568(18) 0.01357(10) Uani 1 1 d . . . 
O1 O 0.17769(18) 0.7109(5) 0.2591(3) 0.0187(8) Uani 1 1 d . . . 
O2 O 0.2761(2) 0.8580(6) 0.2779(3) 0.0257(9) Uani 1 1 d . . . 
O4 O 0.48795(19) 0.8141(6) 0.5095(3) 0.0211(8) Uani 1 1 d . . . 
O5 O 0.5240(2) 0.7075(6) 0.6544(3) 0.0252(8) Uani 1 1 d . . . 
O6 O 0.2824(2) 0.4123(6) 0.5936(3) 0.0273(9) Uani 1 1 d D . . 
H6 H 0.2389 0.3947 0.5598 0.041 Uiso 1 1 calc R . . 
O7 O -0.02552(19) 0.3878(6) 0.1312(2) 0.0217(8) Uani 1 1 d . . . 
O8 O -0.09260(19) 0.4428(7) 0.1973(3) 0.0274(9) Uani 1 1 d . . . 
O9 O 0.1372(2) 0.6410(7) 0.0525(3) 0.0273(9) Uani 1 1 d D . . 
O10 O 0.1116(2) 0.1207(6) 0.2093(3) 0.0339(10) Uani 1 1 d D . . 
C1 C 0.2436(3) 0.7477(7) 0.3041(4) 0.0156(10) Uani 1 1 d . . . 
C2 C 0.2869(3) 0.6590(7) 0.4025(4) 0.0163(10) Uani 1 1 d . . . 
O3 O 0.3574(2) 0.7044(6) 0.4433(3) 0.0228(8) Uani 1 1 d . . . 
C6 C 0.4023(3) 0.6518(7) 0.5349(4) 0.0168(10) Uani 1 1 d . . . 
C7 C 0.4774(3) 0.7253(7) 0.5692(4) 0.0175(10) Uani 1 1 d . . . 
C5 C 0.3809(3) 0.5545(8) 0.5877(4) 0.0201(11) Uani 1 1 d . . . 
H5 H 0.4137 0.5219 0.6507 0.024 Uiso 1 1 calc R . . 
C4 C 0.3067(3) 0.5020(6) 0.5447(4) 0.0183(11) Uani 1 1 d DU . . 
C3 C 0.2601(3) 0.5576(8) 0.4484(4) 0.0185(10) Uani 1 1 d . . . 
H3 H 0.2115 0.5242 0.4173 0.022 Uiso 1 1 calc R . . 
C8 C -0.0343(3) 0.4157(8) 0.2007(3) 0.0186(11) Uani 1 1 d . . . 
H9A H 0.108(2) 0.646(11) -0.0071(11) 0.05(2) Uiso 1 1 d D . . 
H10A H 0.088(3) 0.019(5) 0.182(4) 0.033(19) Uiso 1 1 d D . . 
H9B H 0.1815(10) 0.626(12) 0.071(4) 0.06(2) Uiso 1 1 d D . . 
H10B H 0.148(3) 0.107(9) 0.265(3) 0.07(3) Uiso 1 1 d D . . 
  
loop_ 
 _atom_site_aniso_label 
 _atom_site_aniso_U_11 
 _atom_site_aniso_U_22 
 _atom_site_aniso_U_33 
 _atom_site_aniso_U_23 
 _atom_site_aniso_U_13 
 _atom_site_aniso_U_12 
Pr1 0.00926(15) 0.01844(15) 0.01286(14) 0.00064(11) 0.00550(11) -0.00043(11) 
O1 0.0101(17) 0.0224(19) 0.0200(18) -0.0011(15) 0.0051(15) -0.0023(15) 
O2 0.0166(19) 0.035(2) 0.024(2) 0.0080(17) 0.0087(16) -0.0033(18) 
O4 0.0165(19) 0.025(2) 0.0225(19) 0.0057(16) 0.0106(16) -0.0011(16) 
O5 0.0140(18) 0.033(2) 0.0190(19) 0.0048(17) 0.0012(16) -0.0022(17) 
O6 0.0178(19) 0.038(2) 0.025(2) 0.0090(18) 0.0099(17) -0.0047(19) 
O7 0.0143(18) 0.037(2) 0.0155(17) -0.0013(17) 0.0089(15) -0.0024(17) 
O8 0.0106(17) 0.056(3) 0.0165(18) 0.0045(18) 0.0073(15) 0.0076(19) 
O9 0.016(2) 0.044(3) 0.020(2) 0.0079(19) 0.0079(17) -0.002(2) 
O10 0.031(3) 0.032(2) 0.030(2) 0.006(2) 0.009(2) -0.005(2) 
C1 0.014(2) 0.016(2) 0.017(2) -0.0015(19) 0.007(2) 0.000(2) 
C2 0.011(2) 0.017(2) 0.018(3) -0.001(2) 0.006(2) 0.001(2) 
O3 0.0154(18) 0.031(2) 0.0190(19) 0.0031(16) 0.0063(16) -0.0020(17) 
C6 0.013(2) 0.017(2) 0.016(2) 0.000(2) 0.004(2) -0.001(2) 
C7 0.013(2) 0.014(2) 0.022(3) 0.002(2) 0.006(2) 0.001(2) 
C5 0.015(3) 0.023(3) 0.017(2) 0.003(2) 0.004(2) 0.000(2) 
C4 0.021(3) 0.004(2) 0.029(3) 0.0001(19) 0.012(2) -0.0020(19) 
C3 0.011(2) 0.022(3) 0.020(2) -0.002(2) 0.006(2) -0.002(2) 
C8 0.016(3) 0.024(3) 0.013(2) -0.001(2) 0.006(2) -0.004(2) 
  
_geom_special_details 
; 
 All esds (except the esd in the dihedral angle between two l.s. planes) 
 are estimated using the full covariance matrix.  The cell esds are taken 
 into account individually in the estimation of esds in distances, angles 
 and torsion angles; correlations between esds in cell parameters are only 
 used when they are defined by crystal symmetry.  An approximate (isotropic) 
 treatment of cell esds is used for estimating esds involving l.s. planes. 
; 
  
loop_ 
 _geom_bond_atom_site_label_1 
 _geom_bond_atom_site_label_2 
 _geom_bond_distance 
 _geom_bond_site_symmetry_2 
 _geom_bond_publ_flag 
Pr1 O1 2.405(4) . ? 
Pr1 O9 2.493(4) . ? 
Pr1 O2 2.495(4) 4_545 ? 
Pr1 O8 2.508(3) 2 ? 
Pr1 O10 2.515(4) . ? 
Pr1 O7 2.527(3) . ? 
Pr1 O4 2.540(4) 4_545 ? 
Pr1 O5 2.722(4) 8_465 ? 
Pr1 O4 2.745(4) 8_465 ? 
Pr1 O3 2.863(4) 4_545 ? 
Pr1 C7 3.042(5) 8_465 ? 
O1 C1 1.248(6) . ? 
O2 C1 1.242(6) . ? 
O2 Pr1 2.495(4) 4 ? 
O4 C7 1.262(6) . ? 
O4 Pr1 2.540(4) 4 ? 
O4 Pr1 2.745(4) 8_566 ? 
O5 C7 1.239(6) . ? 
O5 Pr1 2.723(4) 8_566 ? 
O6 C4 1.305(5) . ? 
O6 H6 0.8200 . ? 
O7 C8 1.253(6) . ? 
O8 C8 1.240(6) . ? 
O8 Pr1 2.508(3) 2 ? 
O9 H9A 0.849(11) . ? 
O9 H9B 0.848(11) . ? 
O10 H10A 0.849(11) . ? 
O10 H10B 0.849(11) . ? 
C1 C2 1.513(7) . ? 
C2 C3 1.345(7) . ? 
C2 O3 1.348(6) . ? 
O3 C6 1.351(6) . ? 
O3 Pr1 2.863(4) 4 ? 
C6 C5 1.338(7) . ? 
C6 C7 1.503(7) . ? 
C7 Pr1 3.042(5) 8_566 ? 
C5 C4 1.428(7) . ? 
C5 H5 0.9300 . ? 
C4 C3 1.419(7) . ? 
C3 H3 0.9300 . ? 
C8 C8 1.535(10) 2 ? 
  
loop_ 
 _geom_angle_atom_site_label_1 
 _geom_angle_atom_site_label_2 
 _geom_angle_atom_site_label_3 
 _geom_angle 
 _geom_angle_site_symmetry_1 
 _geom_angle_site_symmetry_3 
 _geom_angle_publ_flag 
O1 Pr1 O9 77.14(13) . . ? 
O1 Pr1 O2 69.37(12) . 4_545 ? 
O9 Pr1 O2 76.94(13) . 4_545 ? 
O1 Pr1 O8 72.94(12) . 2 ? 
O9 Pr1 O8 149.83(14) . 2 ? 
O2 Pr1 O8 95.82(12) 4_545 2 ? 
O1 Pr1 O10 118.10(14) . . ? 
O9 Pr1 O10 131.85(15) . . ? 
O2 Pr1 O10 68.71(14) 4_545 . ? 
O8 Pr1 O10 68.39(15) 2 . ? 
O1 Pr1 O7 124.72(12) . . ? 
O9 Pr1 O7 134.47(12) . . ? 
O2 Pr1 O7 145.05(13) 4_545 . ? 
O8 Pr1 O7 64.42(11) 2 . ? 
O10 Pr1 O7 77.00(14) . . ? 
O1 Pr1 O4 155.93(12) . 4_545 ? 
O9 Pr1 O4 80.18(13) . 4_545 ? 
O2 Pr1 O4 113.10(11) 4_545 4_545 ? 
O8 Pr1 O4 128.64(12) 2 4_545 ? 
O10 Pr1 O4 83.34(14) . 4_545 ? 
O7 Pr1 O4 68.02(11) . 4_545 ? 
O1 Pr1 O5 68.66(11) . 8_465 ? 
O9 Pr1 O5 90.92(13) . 8_465 ? 
O2 Pr1 O5 137.91(12) 4_545 8_465 ? 
O8 Pr1 O5 74.79(13) 2 8_465 ? 
O10 Pr1 O5 137.06(14) . 8_465 ? 
O7 Pr1 O5 67.51(12) . 8_465 ? 
O4 Pr1 O5 103.98(11) 4_545 8_465 ? 
O1 Pr1 O4 103.46(12) . 8_465 ? 
O9 Pr1 O4 67.93(12) . 8_465 ? 
O2 Pr1 O4 144.81(12) 4_545 8_465 ? 
O8 Pr1 O4 115.45(12) 2 8_465 ? 
O10 Pr1 O4 136.28(13) . 8_465 ? 
O7 Pr1 O4 68.13(11) . 8_465 ? 
O4 Pr1 O4 59.90(14) 4_545 8_465 ? 
O5 Pr1 O4 47.51(11) 8_465 8_465 ? 
O1 Pr1 O3 120.23(11) . 4_545 ? 
O9 Pr1 O3 67.41(13) . 4_545 ? 
O2 Pr1 O3 57.01(11) 4_545 4_545 ? 
O8 Pr1 O3 132.76(13) 2 4_545 ? 
O10 Pr1 O3 65.83(13) . 4_545 ? 
O7 Pr1 O3 114.41(12) . 4_545 ? 
O4 Pr1 O3 56.11(11) 4_545 4_545 ? 
O5 Pr1 O3 151.70(11) 8_465 4_545 ? 
O4 Pr1 O3 105.40(10) 8_465 4_545 ? 
O1 Pr1 C7 89.09(13) . 8_465 ? 
O9 Pr1 C7 83.18(14) . 8_465 ? 
O2 Pr1 C7 153.32(13) 4_545 8_465 ? 
O8 Pr1 C7 92.47(14) 2 8_465 ? 
O10 Pr1 C7 137.59(14) . 8_465 ? 
O7 Pr1 C7 60.59(13) . 8_465 ? 
O4 Pr1 C7 80.26(13) 4_545 8_465 ? 
O5 Pr1 C7 24.01(12) 8_465 8_465 ? 
O4 Pr1 C7 24.50(12) 8_465 8_465 ? 
O3 Pr1 C7 129.86(12) 4_545 8_465 ? 
C1 O1 Pr1 139.3(3) . . ? 
C1 O2 Pr1 134.8(3) . 4 ? 
C7 O4 Pr1 133.1(3) . 4 ? 
C7 O4 Pr1 91.1(3) . 8_566 ? 
Pr1 O4 Pr1 120.10(14) 4 8_566 ? 
C7 O5 Pr1 92.6(3) . 8_566 ? 
C4 O6 H6 109.5 . . ? 
C8 O7 Pr1 118.0(3) . . ? 
C8 O8 Pr1 120.0(3) . 2 ? 
Pr1 O9 H9A 117(4) . . ? 
Pr1 O9 H9B 115(5) . . ? 
H9A O9 H9B 117(2) . . ? 
Pr1 O10 H10A 131(4) . . ? 
Pr1 O10 H10B 112(4) . . ? 
H10A O10 H10B 117(2) . . ? 
O2 C1 O1 126.2(5) . . ? 
O2 C1 C2 117.1(4) . . ? 
O1 C1 C2 116.6(4) . . ? 
C3 C2 O3 122.4(5) . . ? 
C3 C2 C1 126.1(5) . . ? 
O3 C2 C1 111.4(4) . . ? 
C2 O3 C6 118.6(4) . . ? 
C2 O3 Pr1 119.4(3) . 4 ? 
C6 O3 Pr1 121.0(3) . 4 ? 
C5 C6 O3 123.8(5) . . ? 
C5 C6 C7 125.5(5) . . ? 
O3 C6 C7 110.6(4) . . ? 
O5 C7 O4 123.4(5) . . ? 
O5 C7 C6 119.4(5) . . ? 
O4 C7 C6 117.0(5) . . ? 
O5 C7 Pr1 63.4(3) . 8_566 ? 
O4 C7 Pr1 64.4(3) . 8_566 ? 
C6 C7 Pr1 154.0(3) . 8_566 ? 
C6 C5 C4 118.2(5) . . ? 
C6 C5 H5 120.9 . . ? 
C4 C5 H5 120.9 . . ? 
O6 C4 C3 121.6(5) . . ? 
O6 C4 C5 120.9(5) . . ? 
C3 C4 C5 117.5(4) . . ? 
C2 C3 C4 119.5(5) . . ? 
C2 C3 H3 120.3 . . ? 
C4 C3 H3 120.3 . . ? 
O8 C8 O7 126.4(5) . . ? 
O8 C8 C8 117.5(5) . 2 ? 
O7 C8 C8 116.1(5) . 2 ? 
  
loop_ 
 _geom_torsion_atom_site_label_1 
 _geom_torsion_atom_site_label_2 
 _geom_torsion_atom_site_label_3 
 _geom_torsion_atom_site_label_4 
 _geom_torsion 
 _geom_torsion_site_symmetry_1 
 _geom_torsion_site_symmetry_2 
 _geom_torsion_site_symmetry_3 
 _geom_torsion_site_symmetry_4 
 _geom_torsion_publ_flag 
O9 Pr1 O1 C1 -70.1(5) . . . . ? 
O2 Pr1 O1 C1 10.5(5) 4_545 . . . ? 
O8 Pr1 O1 C1 113.8(5) 2 . . . ? 
O10 Pr1 O1 C1 60.7(5) . . . . ? 
O7 Pr1 O1 C1 154.1(5) . . . . ? 
O4 Pr1 O1 C1 -90.1(6) 4_545 . . . ? 
O5 Pr1 O1 C1 -166.3(5) 8_465 . . . ? 
O4 Pr1 O1 C1 -133.3(5) 8_465 . . . ? 
O3 Pr1 O1 C1 -16.2(5) 4_545 . . . ? 
C7 Pr1 O1 C1 -153.4(5) 8_465 . . . ? 
O1 Pr1 O7 C8 -27.8(4) . . . . ? 
O9 Pr1 O7 C8 -135.3(4) . . . . ? 
O2 Pr1 O7 C8 76.3(4) 4_545 . . . ? 
O8 Pr1 O7 C8 15.5(4) 2 . . . ? 
O10 Pr1 O7 C8 87.6(4) . . . . ? 
O4 Pr1 O7 C8 175.5(4) 4_545 . . . ? 
O5 Pr1 O7 C8 -67.8(4) 8_465 . . . ? 
O4 Pr1 O7 C8 -119.3(4) 8_465 . . . ? 
O3 Pr1 O7 C8 143.1(4) 4_545 . . . ? 
C7 Pr1 O7 C8 -93.4(4) 8_465 . . . ? 
Pr1 O2 C1 O1 178.7(4) 4 . . . ? 
Pr1 O2 C1 C2 2.8(7) 4 . . . ? 
Pr1 O1 C1 O2 95.5(7) . . . . ? 
Pr1 O1 C1 C2 -88.5(6) . . . . ? 
O2 C1 C2 C3 170.8(5) . . . . ? 
O1 C1 C2 C3 -5.5(8) . . . . ? 
O2 C1 C2 O3 -5.2(6) . . . . ? 
O1 C1 C2 O3 178.5(4) . . . . ? 
C3 C2 O3 C6 -2.4(7) . . . . ? 
C1 C2 O3 C6 173.7(4) . . . . ? 
C3 C2 O3 Pr1 -170.9(4) . . . 4 ? 
C1 C2 O3 Pr1 5.2(5) . . . 4 ? 
C2 O3 C6 C5 0.9(7) . . . . ? 
Pr1 O3 C6 C5 169.3(4) 4 . . . ? 
C2 O3 C6 C7 -176.7(4) . . . . ? 
Pr1 O3 C6 C7 -8.3(5) 4 . . . ? 
Pr1 O5 C7 O4 24.6(5) 8_566 . . . ? 
Pr1 O5 C7 C6 -150.6(4) 8_566 . . . ? 
Pr1 O4 C7 O5 -159.1(4) 4 . . . ? 
Pr1 O4 C7 O5 -24.3(5) 8_566 . . . ? 
Pr1 O4 C7 C6 16.2(7) 4 . . . ? 
Pr1 O4 C7 C6 151.0(4) 8_566 . . . ? 
Pr1 O4 C7 Pr1 -134.8(4) 4 . . 8_566 ? 
C5 C6 C7 O5 -4.7(8) . . . . ? 
O3 C6 C7 O5 172.8(5) . . . . ? 
C5 C6 C7 O4 179.8(5) . . . . ? 
O3 C6 C7 O4 -2.6(6) . . . . ? 
C5 C6 C7 Pr1 -93.6(9) . . . 8_566 ? 
O3 C6 C7 Pr1 83.9(9) . . . 8_566 ? 
O3 C6 C5 C4 0.3(8) . . . . ? 
C7 C6 C5 C4 177.6(5) . . . . ? 
C6 C5 C4 O6 -177.9(5) . . . . ? 
C6 C5 C4 C3 -0.2(7) . . . . ? 
O3 C2 C3 C4 2.6(8) . . . . ? 
C1 C2 C3 C4 -173.0(5) . . . . ? 
O6 C4 C3 C2 176.5(5) . . . . ? 
C5 C4 C3 C2 -1.2(7) . . . . ? 
Pr1 O8 C8 O7 175.0(4) 2 . . . ? 
Pr1 O8 C8 C8 -4.9(5) 2 . . 2 ? 
Pr1 O7 C8 O8 156.4(5) . . . . ? 
Pr1 O7 C8 C8 -23.6(4) . . . 2 ? 
  
_diffrn_measured_fraction_theta_max    0.994 
_diffrn_reflns_theta_full              26.37 
_diffrn_measured_fraction_theta_full   0.994 
_refine_diff_density_max    1.439 
_refine_diff_density_min   -1.272 
_refine_diff_density_rms    0.138 
